# Supplementary material for: Sativex® (nabiximols) cannabinoid oromucosal spray in patients with resistant multiple sclerosis spasticity: the Belgian experience
Source: BMC Neurol. 2021 Jun 22;21:227. doi: 10.1186/s12883-021-02246-0 (PMC8218396; doi:10.1186/s12883-021-02246-0)
Supplement: Supplementary file 1 — Additional file 1. Supplementary Information: Participating centers, neurologists and listed in order of their respective contributions in number of patients. [file 12883_2021_2246_MOESM1_ESM.docx]

**SATIVEX® (nabiximols) cannabinoid oromucosal spray in patients with resistant multiple sclerosis spasticity: the Belgian experience**

Marie D’hooghe1*, Barbara Willekens2, 3, Valerie Delvaux4, Miguel D’haeseleer1, Daniel Guillaume5, Guy Laureys6, Guy Nagels1, Patrick Vanderdonckt7, Vincent Van Pesch8 and Veronica Popescu,9,10

1National MS Center, Vanheylenstraat 16, 1820 Melsbroek, Belgium

2Antwerp University Hospital , Department of Neurology, Drie Eikenstraat 655, 2650 Edegem, Belgium

3University of Antwerp, Translational Neurosciences Research Group and Laboratory of Experimental Hematology, Vaccine & Infectious Disease Institute (VAXINFECTIO), Faculty of Medicine and Health Sciences, Universiteitsplein 1, 2610 Wilrijk, Belgium

4CHR de la Citadelle - Liège, Belgium

5CHU Liège – Centre Neurologique et de réadaptation fonctionelle (CNRF), Belgium

6 University Hospital Ghent, Belgium

7AZ Groeninge Kortrijk, Belgium

8Cliniques Universitaires Saint-Luc – Brussels, Belgium

9Universtity MS Centre, Noorderhart Hospital, Maesensveld 1, 3900 Pelt, Belgium

10University MS Center, U Hasselt, Noorderhart Hospital, Martelarenlaan 42, 3500 Hasselt, Belgium

* **Author for correspondence:** Marie D’hooghe

Electronic address: [marie.dhooghe@mscenter.be](mailto:marie.dhooghe@mscenter.be)

**Supplementary Information: Participating centers**, neurologists and listed in order of their respective contributions in number of patients.

| **Center** | **Responsible neurologists** | **Number of Patients** |
| --- | --- | --- |
| Antwerp University Hospital | Dr. Barbara Willekens | 8 |
| AZ Groeninge-Kortrijk | Dr. Patrick Vanderdonckt | 14 |
| Centre Neurologique et de réadaptation fonctionnelle (CNRF)  Liège | Dr. Daniel Guillaume | 15 |
| CHR de la Citadelle  Liège | Prof. Dr. Valerie Delvaux | 7 |
| Cliniques Universitaires Saint-Luc-Brussels | Prof. Dr. Vincent Van Pesch | 14 |
| National MS Center Melsbroek | Prof. Dr. Marie D’hooghe, Prof Dr Miguel D’Haeseleer, Prof Dr Guy Nagels | 103 |
| University MS Centre Pelt | Prof. Dr. Veronica Popescu | 113 |
| UZG Ghent | Prof. Dr. Guy Laureys | 2 |
